# Supplementary material for: Carbon-nitrogen coupling under three schemes of model representation: Traceability analysis
Source: Copernicus journal article supplement (doi:10.5194/gmd-2018-41), 2018-03-15
Supplement: Supplementary file 1 [file gmd-2018-41-supplement.pdf]

1 **Supplemental information**

2 **Figure S1**

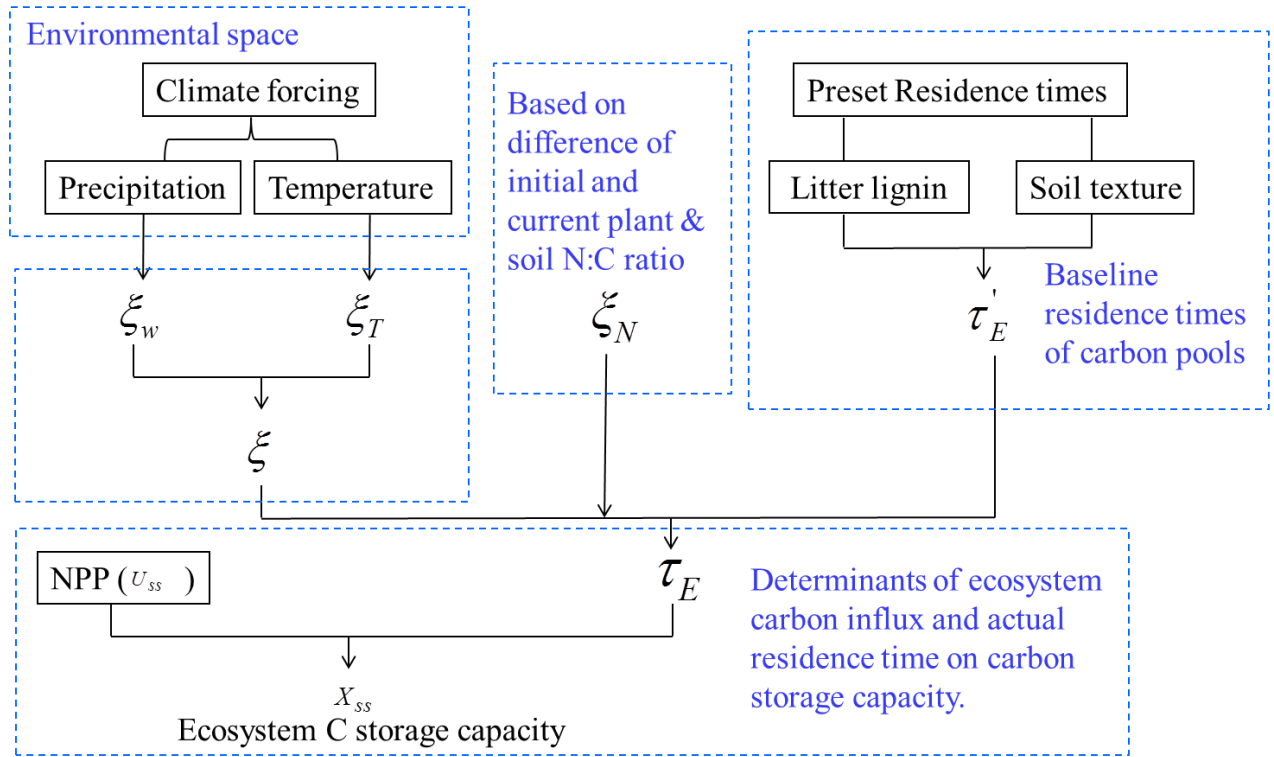

3

4 **Figure S1.** Schematic diagram of the traceability analysis framework.  $X_{ss}$ , ecosystem carbon  
5 storage capacity;  $\tau_E$ , ecosystem carbon residence time;  $\tau'_E$ , baseline carbon residence time;  $\xi_N$ ,  
6 nitrogen scalar;  $\xi$ , environmental scalar;  $\xi_T$ , temperature scalar;  $\xi_W$ , water scalar.

7
